# Supplementary material for: Impact of a Natural Fusarial Multi-Mycotoxin Challenge on Broiler Chickens and Mitigation Properties Provided by a Yeast Cell Wall Extract and a Postbiotic Yeast Cell Wall-Based Blend
Source: MDPI journal article supplement (doi:10.3390/toxins14050315), 2022-04-28
Supplement: s1 [file s1]

# Supplementary section

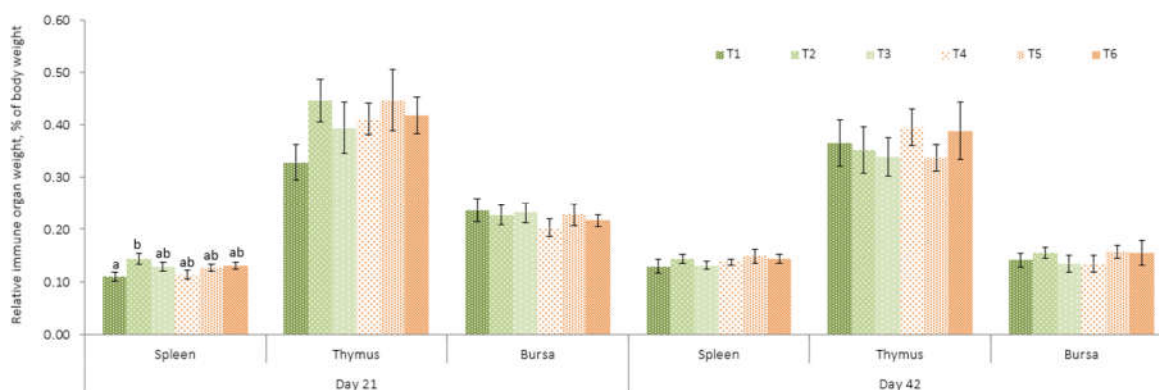

**Figure S1.** Comparison of the internal organ weights (expressed as relative percentage to total body weight) after respectively 21 and 42 days in broilers fed a control diet or *Fusarium*-mycotoxins contaminated diet, with or without supplementation of a yeast cell wall extract (YCWE) or postbiotic yeast cell wall-based blend (PYCW) added at an inclusion rate of 2.0 kg/T. T1 = Control with no supplement and no mycotoxin challenge (CON); T2 = T1 + YCWE; T3 = T1 + PYCW; T4 = Contaminated diet (TOX: 3.0 mg/kg DON, 0.1 mg/kg T-2, 0.079 mg/kg ZEA); T5 = T4 + YCWE; T6 = T4 + PYCW. Different superscript letters above the bars indicate significant differences between treatments,  $P \leq 0.05$  (ANOVA followed by Tukey's multiple range test).

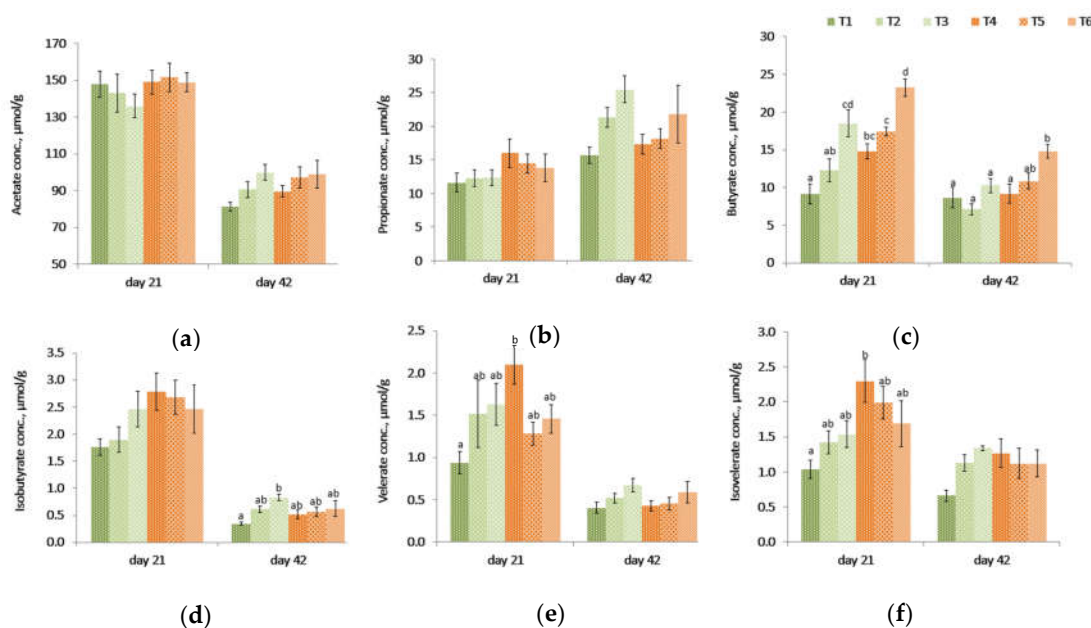

**Figure S2.** Effect of a *Fusarium* multi-mycotoxin challenge compared to a control diet on the caecal concentration of (a) acetate, (b) propionate, (c) butyrate, (d) isobutyrate, (e) valerate, (f) isovalerate short-chain fatty acids of broilers with or without the addition of a yeast cell wall extract (YCWE) or postbiotic yeast cell wall-based blend (PYCW) (mean  $\pm$  SE). T1 = Control with no supplement and no mycotoxin challenge (CON); T2 = T1 + YCWE; T3 = T1 + PYCW; T4 = Contaminated diet (TOX: 3.0 mg/kg DON, 0.1 mg/kg T-2, 0.079 mg/kg ZEA); T5 = T4 + YCWE; T6 = T4 + PYCW. Different superscript letters above the bars indicate significant differences between treatments,  $P \leq 0.05$  (ANOVA followed by Tukey's multiple range test).

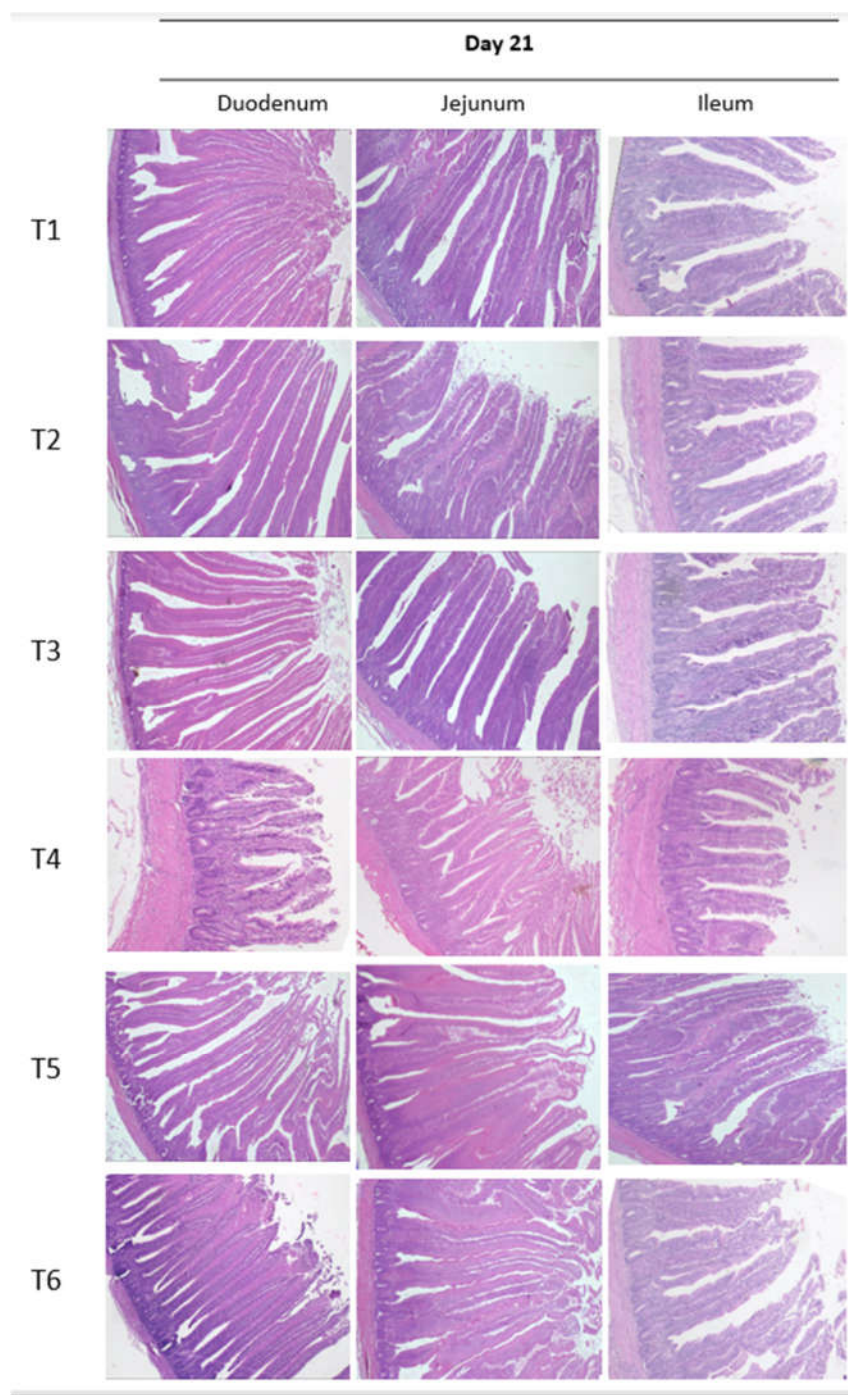

**Figure S3.** Histological observations of intestinal villi using light microscopy after staining of duodenum, jejunum and ileum small intestine tissue samples collected on day 21 for broilers fed *Fusarium* multi-mycotoxin challenge compared to a control diet with or without the addition of a yeast cell wall extract (YCWE) or postbiotic yeast cell wall-based blend (PYCW). T1 = Control with no supplement and no mycotoxin challenge (CON); T2 = T1 + YCWE; T3 = T1 + PYCW; T4 = Contaminated diet (TOX: 3.0 mg/kg DON; 2.17 mg/kg 3-ADON; 104 µg/kg T-2; 79 µg/kg ZEA); T5 = T4 + YCWE; T6 = T4 + PYCW.

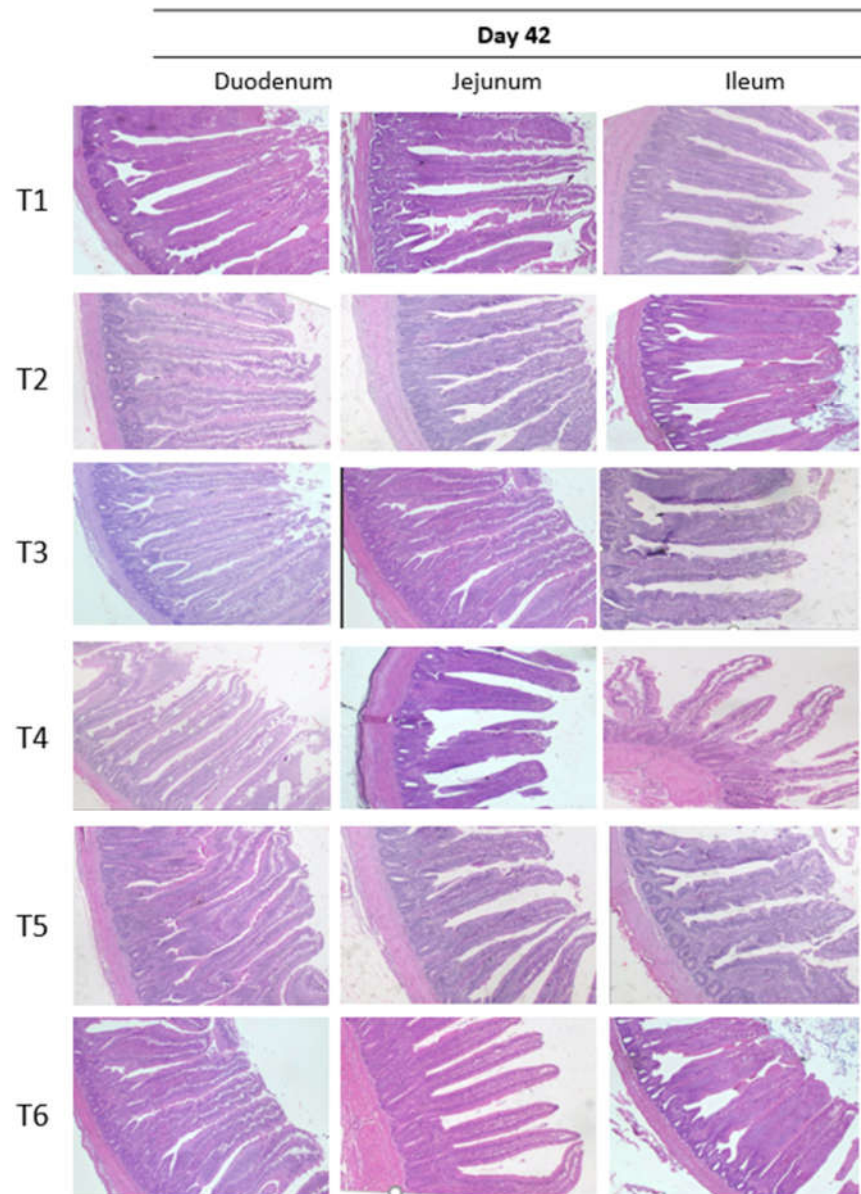

**Figure S4.** Histological observations of intestinal villi using light microscopy after staining of duodenum, jejunum and ileum small intestine tissue samples collected on day 42 for broilers fed *Fusarium* multi-mycotoxin challenge compared to a control diet, with or without the addition of a yeast cell wall extract (YCWE) or postbiotic yeast cell wall-based blend (PYCW). T1 = Control with no supplement and no mycotoxin challenge (CON); T2 = T1 + YCWE; T3 = T1 + PYCW; T4 = Contaminated diet (TOX: 3.0 mg/kg DON; 2.17 mg/kg 3-ADON; 104 µg/kg T-2; 79 µg/kg ZEA); T5 = T4 + YCWE; T6 = T4 + PYCW.

**Table S1.** Monitoring of the gut intestinal pH after respectively 21 and 42 days in broilers fed a control diet or *Fusarium*-mycotoxins contaminated diet, with or without supplementation of a yeast cell wall extract (YCWE) or postbiotic yeast cell wall-based blend (PYCW) added at an inclusion rate of 2.0 kg/T.

| Treatments*                   | pH at Day 21 |              |             | pH at Day 42 |              |                           |
|-------------------------------|--------------|--------------|-------------|--------------|--------------|---------------------------|
|                               | Duodenum     | Jejunum      | Ileum       | Duodenum     | Jejunum      | Ileum                     |
| T1: CON                       | 6.15 ± 0.02  | 5.82 ± 0.07  | 5.83 ± 0.08 | 5.93 ± 0.03  | 5.72 ± 0.03  | 6.09 ± 0.08 <sup>ab</sup> |
| T2: CON + YCWE                | 6.03 ± 0.04  | 5.68 ± 0.04  | 5.69 ± 0.09 | 5.87 ± 0.07  | 5.83 ± 0.05  | 6.04 ± 0.09 <sup>ab</sup> |
| T3: CON + PYCW                | 6.03 ± 0.03  | 5.62 ± 0.05  | 5.68 ± 0.09 | 6.02 ± 0.04  | 5.76 ± 0.10  | 5.85 ± 0.08 <sup>a</sup>  |
| T4: TOX                       | 6.07 ± 0.02  | 5.69 ± 0.04  | 5.73 ± 0.07 | 5.98 ± 0.08  | 5.88 ± 0.05  | 6.20 ± 0.06 <sup>b</sup>  |
| T5: TOX + YCWE                | 6.05 ± 0.02  | 5.64 ± 0.05  | 5.68 ± 0.08 | 6.07 ± 0.04  | 5.89 ± 0.04  | 6.34 ± 0.06 <sup>b</sup>  |
| T6: TOX + PYCW                | 6.03 ± 0.03  | 5.71 ± 0.03  | 5.57 ± 0.09 | 6.10 ± 0.03  | 5.86 ± 0.05  | 6.07 ± 0.09 <sup>ab</sup> |
| Main effect, <i>P</i> -Values | 0.156        | 0.164        | 0.522       | 0.053        | 0.277        | <b>0.003</b>              |
| Contrast, <i>P</i> -Values:   |              |              |             |              |              |                           |
| T1 vs T2                      | 0.053        | 0.132        | 0.318       | 0.474        | 0.135        | 0.653                     |
| T1 vs T3                      | <b>0.018</b> | <b>0.035</b> | 0.285       | 0.106        | 0.689        | <b>0.048</b>              |
| T1 vs T4                      | 0.062        | 0.137        | 0.423       | 0.585        | <b>0.011</b> | 0.318                     |
| T4 vs T5                      | 0.662        | 0.535        | 0.653       | 0.361        | 0.864        | 0.155                     |
| T4 vs T6                      | 0.349        | 0.708        | 0.198       | 0.187        | 0.800        | 0.274                     |

\*Treatments description: T1 = Control with no supplement, no mycotoxin challenge (CON); T2 = T1 + YCWE; T3 = T1 + PYCW; T4 = Contaminated diet (TOX: 3.0 mg/kg DON, 0.1 mg/kg T-2, 0.079 mg/kg ZEA); T5 = T4 + YCWE; T6 = T4 + PYCW. Means within a column bearing different superscripts differ significantly ( $P \leq 0.05$ ) for the main effects of treatments (ANOVA followed by Tukey's multiple range test).

**Table S2.** Goblet cell count in the small intestine of broilers fed a basal diet or *Fusarium* contaminated diet supplemented, with or without supplementation of a yeast cell wall extract-based product (YCWE) or postbiotic yeast cell wall-based product (PYCW) at an inclusion rate of 2.0 kg/T (n=12).

| Treatments*                   | Counts, Day 21            |             |                           | Counts, Day 42            |              |                           |
|-------------------------------|---------------------------|-------------|---------------------------|---------------------------|--------------|---------------------------|
|                               | Duodenum                  | Jejunum     | Ileum                     | Duodenum                  | Jejunum      | Ileum                     |
| T1: CON                       | 6.43 ± 0.37 <sup>ab</sup> | 6.50 ± 0.77 | 6.62 ± 0.35 <sup>ab</sup> | 8.06 ± 0.43 <sup>a</sup>  | 7.81 ± 0.34  | 6.87 ± 0.59 <sup>a</sup>  |
| T2: CON + YCWE                | 8.06 ± 1.06 <sup>a</sup>  | 7.93 ± 0.87 | 7.93 ± 0.34 <sup>b</sup>  | 8.87 ± 0.22 <sup>a</sup>  | 7.43 ± 0.35  | 7.75 ± 0.41 <sup>ab</sup> |
| T3: CON + PYCW                | 8.75 ± 1.16 <sup>a</sup>  | 8.37 ± 0.59 | 8.25 ± 0.35 <sup>b</sup>  | 10.68 ± 0.31 <sup>b</sup> | 7.93 ± 0.40  | 9.18 ± 0.43 <sup>b</sup>  |
| T4: TOX                       | 4.56 ± 0.4 <sup>b</sup>   | 6.25 ± 0.44 | 5.31 ± 0.61 <sup>a</sup>  | 8.18 ± 0.2 <sup>a</sup>   | 7.31 ± 0.40  | 6.43 ± 0.31 <sup>a</sup>  |
| T5: TOX + YCWE                | 8.12 ± 0.76 <sup>a</sup>  | 7.56 ± 0.57 | 6.81 ± 0.56 <sup>ab</sup> | 11.12 ± 0.41 <sup>b</sup> | 8.43 ± 0.34  | 7.62 ± 0.45 <sup>ab</sup> |
| T6: TOX + PYCW                | 8.31 ± 0.43 <sup>a</sup>  | 7.93 ± 0.46 | 6.62 ± 0.61 <sup>ab</sup> | 10.37 ± 0.35 <sup>b</sup> | 8.68 ± 0.28  | 8.93 ± 0.26 <sup>b</sup>  |
| Main effect, <i>P</i> -Values | <b>0.002</b>              | 0.123       | <b>0.001</b>              | <b>&lt;0.001</b>          | <b>0.052</b> | <b>&lt;0.001</b>          |
| Contrast, <i>P</i> -Values:   |                           |             |                           |                           |              |                           |
| T1 vs T2                      | 0.140                     | 0.117       | 0.061                     | 0.090                     | 0.460        | 0.152                     |
| T1 vs T3                      | <b>0.037</b>              | 0.052       | <b>0.021</b>              | <b>0.000</b>              | 0.805        | <b>0.000</b>              |
| T1 vs T4                      | 0.089                     | 0.784       | 0.061                     | 0.793                     | 0.325        | 0.472                     |
| T4 vs T5                      | <b>0.002</b>              | 0.151       | <b>0.033</b>              | <b>0.000</b>              | <b>0.029</b> | 0.053                     |
| T4 vs T6                      | <b>0.001</b>              | 0.066       | 0.061                     | <b>0.000</b>              | <b>0.008</b> | <b>0.000</b>              |

\*Treatments description: T1 = Control with no supplement, no mycotoxin challenge (CON); T2 = T1 + YCWE; T3 = T1 + PYCW; T4 = Contaminated diet (TOX: 3.0 mg/kg DON, 0.1 mg/kg T-2, 0.079 mg/kg ZEA); T5 = T4 + YCWE; T6 = T4 + PYCW. Means within a column bearing different superscripts differ significantly ( $P \leq 0.05$ ) for the main effects of treatments (ANOVA followed by Tukey's multiple range test).
